## **Heritability of skewed X-inactivation in female twins is tissue-specific and dependent on age**

Antonino Zito<sup>1</sup>, Matthew N. Davies<sup>2</sup>, Pei-Chien Tsai<sup>1</sup>, Susanna Roberts<sup>3</sup>, Stefano Nardone<sup>4</sup>, Jordana T. Bell<sup>1</sup>, Chloe C. Y. Wong<sup>3</sup> & Kerrin S. Small<sup>1</sup>.

<sup>1</sup> Department of Twin Research & Genetic Epidemiology, King's College London, London SE1 7EH, UK

<sup>2</sup> The Francis Crick Institute, 1 Midland Road, London NW1 1AT, UK

<sup>3</sup> Institute of Psychiatry, Psychology & Neuroscience, King's College London, London SE5 8AF, UK

<sup>4</sup> Division of Endocrinology, Diabetes, and Metabolism, Department of Medicine, Beth Israel Deaconess Medical Center, Harvard Medical School, Boston, MA 02215, USA

### 3 **Abstract**

4 To balance the X-linked transcriptional dosages between the sexes, one of the two X-chromosomes  
5 is randomly selected to be inactivated in somatic tissues of female placental mammals. Non-  
6 random, or skewed X-chromosome inactivation (XCI) toward one parental X has been observed in  
7 female somatic tissues, and this skewing effect has been associated with several complex human  
8 traits. However, the extent of the influence of genetic and environmental factors on XCI skewing is  
9 largely unknown. Here, we use RNA-seq and DNA-seq data taken from a large cohort of female twins  
10 to quantify the degree of skewing of XCI (DS) in multiple tissues and to study the relationship of XCI  
11 with age, genetic factors and complex traits. We show that the XCI patterns are highly tissue-specific  
12 with a higher prevalence of skewed XCI in blood-derived tissues than in fat or skin tissue. We also  
13 show that the DS in blood-derived tissues is associated with age and that the acquired DS occurs  
14 uniquely in blood-derived tissues with an inflection point at approximately 55 years of age.  
15 Heritability analysis indicates that the heritability of DS is both age and tissue specific; DS is heritable  
16 in blood tissue of females >55 years-old ( $h^2 = 0.34$ ) but is not heritable in blood tissues of females  
17 <55 years-old ( $h^2 = 0$ ), nor in skin and fat tissues at any age. We find a positive association between  
18 the DS and smoking status in blood tissues of older females ( $P = 0.02$ ). The high tissue specificity of  
19 XCI patterns in human indicates the existence of tissue-specific mechanisms influencing XCI  
20 patterns, including genetic and environmental factors. We conclude that the heritability of XCI  
21 skewing in blood-derived tissues is dependent on age, representing a Gene x Age interaction that  
22 can shift the functional allelic dosage of an entire chromosome in a tissue-restricted manner.

23

24

25

26

## 27 **Introduction**

28 To balance the X-linked transcriptional dosages between the single X chromosome of males and the  
29 two X chromosomes of females, one X chromosome is silenced in female placental mammals<sup>1</sup>. The  
30 X-chromosome inactivation (XCI) process starts during preimplantation phases of human embryonic  
31 development, presumably at around the 8-cell stage<sup>2</sup>. XCI is initiated by the transcription of *XIST*, a  
32 17 kb, alternatively spliced long non-coding RNA mapped to Xq13.2 and exclusively expressed on  
33 the inactive X (Xi)<sup>3</sup>. Once transcribed, *XIST* molecules spread in *cis* along the X chromosome<sup>4,5</sup>  
34 inducing a progressive epigenetic silencing through the recruitment of chromatin remodelling  
35 enzymatic complexes, which impose repressive histone and DNA changes on the Xi chromosome<sup>6,7</sup>.  
36 Within each cell, the parental X chromosome selected for inactivation seems to occur at random,  
37 and the Xi is mitotically inherited to future somatic daughter cells. This random inactivation results  
38 in a mosaic of cells within an individual, where overall, a balanced expression (50:50) of both  
39 parental X-linked alleles is expected. Asymmetric selection of the X chromosome to inactivate  
40 causes the predominance of one parental Xi in a population of cells, unbalancing the X-linked  
41 transcriptional and allelic dosages toward one parental X chromosome. This phenomenon, known  
42 as skewed XCI (or non-random XCI), occurs when at least 80% of cells within a tissue inactivate the  
43 same parental X chromosome. The factors underlying primary skewed XCI are varied and several  
44 mechanisms are possible (reviewed in<sup>8</sup>). Secondary (or acquired) skewed XCI can result from  
45 positive selection of cells that after having inactivated a particular parental X, acquire a survival  
46 advantage over cells who inactivated the other parental X chromosome. Skewed XCI patterns can  
47 also be generated by the stochastic overrepresentation of cell clones in a given tissue, due for  
48 instance, to depletion of stem cell populations.

49  
50 Comprised of 155 MB and containing >800 protein-coding genes, the X chromosome represents  
51 approximately 8% of the human genome. In heterozygous females with skewed XCI, the X-linked

52 transcriptional and allelic dosages of silenced genes are unbalanced and may be functionally  
53 homozygous. Skewed XCI is a major cause of discontinuity of dominance and recessiveness, as well  
54 as penetrance and expressivity of X-linked traits. How skewed XCI patterns modulate phenotypes in  
55 females, and whether they are a cause or a consequence of associated phenotypes is not fully  
56 understood. Skewed XCI patterns have been observed in females with X-linked diseases<sup>9,10</sup>,  
57 autoimmune disorders<sup>11,12</sup>, as well as in breast<sup>13</sup> and ovarian cancer<sup>14</sup>. In autoimmune diseases with  
58 higher prevalence in females, including rheumatoid arthritis and systemic lupus erythematosus, XCI  
59 is hypothesized to play a role. Chromosome X is enriched for immune-related genes and skewed XCI  
60 patterns cause the breakdown of thymic tolerance induction processes<sup>15</sup> conferring a high  
61 predisposition to develop autoimmunity (reviewed in<sup>16</sup>). XCI skewing levels in blood-tissues have  
62 been associated with ageing, with multiple studies indicating an increase after 50-60 years of age<sup>17-</sup>  
63 <sup>22</sup>. To date, the mechanisms underlying skewed XCI in humans remain to be determined and  
64 hypotheses are still controversial. Several twin studies have reported that genetic factors contribute  
65 to XCI skewing in blood derived cells<sup>21,23</sup>, while other evidence indicated that most of the XCI  
66 skewing levels in human are acquired secondarily<sup>24</sup>.

67  
68 Nearly all studies of XCI skewing levels in humans have been carried out in peripheral blood samples  
69 or in very small sample sizes<sup>25</sup>, while XCI patterns in other tissues have not been studied in great  
70 detail<sup>19,26,27</sup>. In this study, we comprehensively assessed XCI patterns in a multi-tissue sample of  
71 nearly 800 female twins from the TwinsUK cohort<sup>28</sup>. We quantified the degree of skewing of XCI  
72 using a metric based on *XIST* allele-specific expression from paired RNA-seq and DNA-seq data in  
73 four tissues. We examined the tissue-specific prevalence of skewed XCI patterns, compared the XCI  
74 skewing levels between tissues and evaluated the association between XCI skewing and lifestyle  
75 traits. In order to investigate the factors underlying the skewed XCI, we utilized classical twin models  
76 to characterize the extent of the influence of genetic and environmental factors on the tissue-

77 specific skewed XCI, showing that the XCI patterns have both a heritable and environmental (age)  
78 basis.

79

## 80 **Results**

### 81 **Quantification of degree of skewing in TwinsUK**

82 We assessed XCI patterns in multi-tissue samples from female twin volunteers from the TwinsUK  
83 cohort aged 38–85 years old (median age = 60; Figure S1)<sup>28,29</sup>. We quantified the degree of skewing  
84 of XCI using a metric based on *XIST* allele-specific expression (ASE) from paired RNA-seq and DNA-  
85 seq data. *XIST* is uniquely expressed from the Xi<sup>3</sup>, so the relative expression of parental alleles within  
86 the *XIST* transcript are representative of XCI skewing levels in a sample<sup>27</sup>. RNA-seq and genotype  
87 data were available for 814 Lymphoblastoid Cell Lines (LCL) samples, 395 whole-blood samples, 766  
88 subcutaneous adipose tissue samples (herein referred as fat) and 716 skin samples. After stringent  
89 quality control, we obtained *XIST*<sub>ASE</sub> calls for 422 LCL samples, 72 whole-blood samples, 378 fat  
90 samples and 336 skin samples. The smaller sample size for whole-blood was due to the relatively  
91 smaller size of the starting dataset and the relatively lower RNA-seq coverage of this tissue in our  
92 dataset. In order to have an absolute measure of the magnitude of the XCI skewing levels in each  
93 sample, we calculated the degree of skewing of XCI (DS) from the *XIST*<sub>ASE</sub> calls. DS is defined as the  
94 absolute deviation of the *XIST*<sub>ASE</sub> from 0.5 (see Materials and methods) and it has been similarly  
95 used in other investigations to assess XCI patterns<sup>20,30,31</sup> and the XCI status of X-linked genes<sup>32</sup>. In  
96 line with previous investigations<sup>21,33</sup> we classified samples with  $DS < 0.3$  (corresponding to  $0.2 <$   
97  $XIST_{ASE} < 0.8$ ) to have random XCI, and samples with  $DS \geq 0.3$  (corresponding to  $XIST_{ASE} \leq 0.2$  or  
98  $XIST_{ASE} \geq 0.8$ ) to have skewed XCI. Unless otherwise specified, DS was used in all the analyses  
99 performed.

100 We assessed the robustness of our estimates of the degree of skewing with an alternative DNA-  
101 based measure of XCI, the Human Androgen Receptor Assay (HUMARA)<sup>34</sup>. HUMARA was and is still

102 the 'gold standard' technique to assess XCI patterns. A previous study has reported good replicability  
103 between HUMARA and expression-based quantification of XCI skewing<sup>35</sup>. We used HUMARA to  
104 measure XCI skewing levels in 10 archived whole-blood DNA samples obtained at the same clinical  
105 visit as the LCLs samples. Spearman's correlation between the quantifications was 0.71, at  $P = 0.031$ ,  
106 revealing a high degree of reproducibility between the both  $XIST_{ASE}$  and HUMARA methods and the  
107 LCLs and whole-blood (Fig 1a).

108  
109 Previous investigations have reported that the XCI skewing levels increase with age in blood tissues,  
110 as discussed below. While it would be expected that increases in XCI skewing levels would be  
111 observed over relatively large time spans, we would expect minimal variations of XCI skewing levels  
112 between 2 close time points. We therefore reasoned that the sensitivity of our quantifications could  
113 also be assessed by comparing the XCI skewing levels in the same individuals at close time points.  
114 Briefly, using a publicly-available longitudinal whole-blood RNA-seq dataset from the TwinsUK  
115 cohort<sup>36</sup>, we generated  $XIST_{ASE}$  calls at 2 time points (1 to 2.7 years later) in 16 samples (see the  
116 Materials and methods). Spearman's correlation between the  $XIST_{ASE}$  calls at the first time point and  
117 the  $XIST_{ASE}$  calls at the second time point was 0.94 at  $P < 2 \times 10^{-15}$  (Fig 1b). This indicates that  $XIST_{ASE}$   
118 is a sensitive proxy when assessing the stability of XCI patterns over short time periods. Overall,  
119 these results indicate that  $XIST_{ASE}$  is a reproducible, accurate and sensitive proxy of XCI skewing  
120 levels.

## 121 122 **Skewed XCI is tissue-specific with higher prevalence in blood-derived tissues**

123 We observed a wide range of DS values in the four tissues (Fig 2), with clear differences in the  
124 prevalence of skewed individuals between tissues. Blood-derived tissues had the highest incidence  
125 of skewed individuals, with skewed XCI observed in 34% of LCLs samples and 28% of whole-blood  
126 samples and a lower incidence in the primary tissues, where 12% of fat and 16% of skin samples

127 exhibited skewed XCI (Table 1). In order to examine the extent of similarities of XCI patterns  
128 between tissues, we compared the tissue-specific XCI skewing levels in a pairwise manner (Fig 3).  
129 For each tissue-tissue comparison, we included individuals with  $XIST_{ASE}$  calls in both tissues (Table  
130 2). We found the strongest correlation on  $XIST_{ASE}$  calls between LCLs and whole-blood ( $N = 59$ ,  $r =$   
131  $0.78$ ,  $P = 2 \times 10^{-13}$ ), indicating that blood-derived tissues share highly similar XCI skewing levels. We  
132 also found a good degree of similarity between the XCI skewing levels in fat and skin tissues ( $N =$   
133  $252$ ,  $r = 0.47$ ,  $P = 2 \times 10^{-15}$ ; Fig 3). However, low concordance was observed between skin and whole-  
134 blood ( $N = 47$ ,  $r = 0.3$ ,  $P = 0.04$ ) and fat and whole-blood ( $N = 57$ ,  $r = 0.33$ ,  $P = 0.02$ ). Our data  
135 demonstrate that tissue-specific XCI skewing within an individual is common in the population,  
136 indicating that XCI patterns are partially controlled by tissue-specific regulatory mechanisms.  
137

The active or inactive state of each X chromosome in a cell is clonally passed on to daughter cells. In a pool of cells derived from a single clone (or patch), the XCI patterns are expected to be completely skewed. Patch size refers to the amount of cell clones in a pool of cells (e.g. in a tissue biopsy). We considered the possibility that patch size might bias our quantification of XCI patterns in fat and skin samples. This is likely to occur in biopsies that are smaller than the tissue patch size. However, several considerations led us to exclude the possibility that patch sizes in fat and skin biopsies might confound our  $XIST_{ASE}$  calls. First, the biopsies included skin samples of  $8mm^3$  in size, which were cut into 2 skin and 3 fat samples. As reported in another study, this size is large enough to measure the XCI ratio without being confounded by patch size<sup>37</sup>. Second, most individuals exhibit random XCI patterns in fat and skin tissues, which is unlikely if patch size was larger than the biopsies. We therefore conclude that the biopsies used in this study are large enough to accurately assess the XCI patterns without being biased by patch size.

138 **LCLs in this study are representative of XCI skewing *in-vivo* in blood tissues**

139 Lymphoblastoid Cell Lines (LCLs) generated by Epstein-Barr virus mediated transformation of B  
140 lymphocyte cells have been and are widely used in gene expression studies. However, the possibility  
141 that the cell lines are monoclonal and/or polyclonal due to selection in the transformation process  
142 or clonal expansion in cell culture, and hence not be representative of the *in-vivo* XCI skewing levels,  
143 is a potential problem when using LCLs to assess XCI skewing<sup>38</sup>. As the profiled RNA in this study was  
144 extracted from the LCLs very shortly after transformation with limited passaging or time in culture  
145 we expected this effect to be minimal, however, to address the possibility we performed the  
146 following analyses. First, as described above and shown in Figure 1a, the degree of skewing in LCLs  
147 were highly correlated with the HUMARA-based quantifications of XCI patterns in paired whole-  
148 blood samples ( $r = 0.71$ ,  $N = 10$ ). We would not expect such high similarity between the two  
149 quantifications if clonal propagation had occurred in LCLs samples after preparation. This was  
150 confirmed by the high correlation between LCLs and whole-blood  $XIST_{ASE}$  values ( $r = 0.78$ ,  $N = 59$ ;  
151 Fig 3) and overall similarity in the prevalence of skewed XCI in LCLs and whole-blood (Table 1).  
152 Finally, we assessed the degree of skewing in monocytes, B, T-CD4<sup>+</sup>, T-CD8<sup>+</sup> and natural-killer (NK)  
153 cells purified from two monozygotic twins exhibiting skewed XCI patterns in LCLs and from one  
154 individual exhibiting random XCI patterns in LCLs. We found that in both monozygotic twins showing  
155 skewed XCI in LCLs, the majority of immune cell types exhibited skewed XCI patterns. Conversely,  
156 none of the immune cell types purified from the non-skewed individual exhibited skewed XCI  
157 patterns (Table 3). We conclude that the XCI skewing levels of LCLs in this study are representative  
158 of XCI skewing *in-vivo* in blood tissues.

159

160 **XCI skewing levels are positively associated with age in blood-derived tissues**

161 XCI skewing levels in peripheral blood have been shown to increase with age in multiple studies<sup>17-  
162 21,23,35,39,40</sup>. The age-related increase of XCI skewing levels continues throughout life, since



163 centenarians exhibit higher XCI skewing levels than 95 years-old females<sup>21</sup>. However, there is very  
164 limited knowledge on the relationship between XCI patterns and ageing in tissues other than blood.  
165 In order to explore this, we investigated the association between age and degree of skewing in LCLs,  
166 fat and skin. Our whole-blood estimates were excluded from analysis due to low sample size (N =  
167 72). Age was positively associated with XCI skew in LCLs (N = 422,  $P < 0.01$ ), but we did not detect  
168 any association between XCI skew and age in skin (N = 336,  $P = 0.4$ ) or in fat (N = 378,  $P = 0.7$ ).  
169  
170 We next explored the dynamics of DS and age progression in each tissue, using the lowess  
171 procedure. Lowess curve detected an increase of DS beginning at around 55 years-old in LCLs (Fig  
172 4), in agreement with what was found in other studies<sup>19,21</sup>. Since the increase of DS starts at around  
173 55 years, we divided LCLs samples into a younger group (N = 141, age < 55) and an older group (N =  
174 281, age  $\geq 55$ ). We found that the mean DS in LCLs was significantly higher in older than in younger  
175 females ( $DS_{\text{younger}} = 0.2$ ,  $DS_{\text{older}} = 0.24$ ,  $P = 0.03$ ; Figure 4). Accordingly, we found that the frequency  
176 of skewed XCI in LCLs was significantly higher in older (38%) than in younger (28%) females ( $\chi^2$  test,  
177  $P = 0.04$ ; Fig 4). In agreement with the lack of association between the DS and age, we did not detect  
178 significant differences between the mean DS in young and older females in fat ( $DS_{\text{younger}} = 0.15$ ,  
179  $DS_{\text{older}} = 0.15$ ) or in skin tissues ( $DS_{\text{younger}} = 0.16$ ,  $DS_{\text{older}} = 0.17$ ). To acquire a more detailed view of  
180 the tissue-specific prevalence of skewed XCI in different groups of age, we categorized the samples  
181 into four age groups (40-50, 50-60, 60-70, >70) and calculated the frequency of skewed XCI in each  
182 category (Fig 4). We found that the frequency of skewed XCI increased with age in LCLs, with 41%  
183 of individuals >65 years-old demonstrating skewed XCI patterns. We did not observe any increase  
184 in the skewed XCI frequencies with age in fat and skin tissues. Overall, these data further confirm  
185 that XCI skewing levels increase with age in blood-derived tissues, supporting previous  
186 investigations. However, we find that there is no increase in XCI in fat and skin tissue from the same

187 individuals, suggesting that acquired XCI skewing with age is a distinctive feature of blood-derived  
188 tissues.

189

### 190 **Heritability of skewed XCI is dependent on tissue and age**

191 Twin studies are a powerful strategy to investigate the heritability of complex traits. Previous twin  
192 studies have reported that skewed XCI in blood-derived samples is heritable, with  $h^2$  estimates of  
193 0.68 in granulocytes of elderly twin pairs and 0.58 in peripheral blood cells<sup>21-23</sup>, however these  
194 studies have not investigated heritability outside of blood. To estimate the influence of additive  
195 genetic effects (heritability) and environmental factors on the observed variance in XCI in the three  
196 tissues, we implemented the ACE twin model. The ACE statistical model quantifies the contribution  
197 of additive genetic effects (A), shared environment (C) and unique environment (E) to the  
198 phenotype variance. In order to investigate whether heritability varies with age, we stratified the  
199 twin pairs into a younger group (age < 55) and an older group (age  $\geq$  55; Table S1). Age 55 was  
200 chosen as it was identified as the inflection point at which XCI skew begins to increase in the lowest  
201 analysis above. We found that XCI skewing is heritable in LCLs of older females ( $h^2 = 0.34$ ,  $P = 9.6e-$   
202  $07$ ), but not younger females ( $h^2 = 0$ ,  $P = 1$ ). There was no evidence of heritability of XCI skew in fat  
203 or in skin tissues at any age (Table 4). The highest proportion of variance was explained by unique  
204 environmental factors in all tissues of both younger and older females ( $E^2_{LCLs\_younger} = 0.99$ ,  $E^2_{LCLs\_older}$   
205  $= 0.66$ ,  $E^2_{Fat\_younger} = 0.73$ ,  $E^2_{Fat\_older} = 0.92$ ,  $E^2_{Skin\_younger} = 1$ ,  $E^2_{Skin\_older} = 1$ ). As a complement to the  
206 heritability analysis, we calculated intraclass correlation (IC) of XCI skew within MZ and DZ twin pairs  
207 of all ages, and within younger and older MZ and DZ twin pairs (Table 5). IC analyses of twin pairs is  
208 often used to demonstrate the existence of genetic effect in smaller sample sizes. The IC of XCI skew  
209 within MZ twin pairs was positive and statistically significant ( $IC_{MZ\_allAges} = 0.31$ ,  $P = 0.02$ ). We found  
210 significant IC of XCI skew within older MZ twin pairs ( $IC_{MZ\_older} = 0.42$ ,  $P = 0.005$ ), but not within  
211 young MZ twin pairs ( $IC_{MZ\_younger} = 0.06$ ,  $P = 0.8$ ). We did not detect significant IC within DZ twin pairs

212 at any age, in agreement with previous study in blood<sup>21</sup>. The higher IC of XCI skew within MZ twin  
213 pairs compared with DZ twin pairs indicates the involvement of genetic determinants in the  
214 regulation of XCI skew in blood-derived tissues. The increase of IC in older compared to younger MZ  
215 twin pairs and the fact that the heritability of XCI skew is observed only in females older than 55,  
216 confirm a role for genetic variants as age-dependent regulators of the acquired XCI skew in blood-  
217 derived tissues. Presumably, genetically-determined secondary cell selection processes act in  
218 haematopoietic cell lineages, with the high mitotic rates contributing to the manifestation of their  
219 effects in blood-derived tissues. Results also highlight an age-independent role for environmental  
220 factors as regulators of XCI skew in blood, fat and skin tissues.

221

## 222 **XCI skew is associated with smoking status in older females**

223 Tobacco smoking has been reported to induce epigenomic changes including DNA methylation  
224 variation (reviewed in<sup>41</sup>). Smoking is a well characterized risk factor in cancer<sup>42</sup> and, as more recently  
225 discovered, in the aetiology of autoimmunity<sup>43</sup>. Although smoking-related X-linked DNA methylation  
226 sites have been discovered<sup>44</sup>, no previous studies, to our knowledge, have investigated the  
227 relationship between smoking and XCI patterns. We reasoned that changes of XCI patterns may  
228 result from smoking, and affect in turn short-term and long-term health. In order to test our  
229 hypothesis, we used the 270 individuals in our dataset for which we had smoking status at the time  
230 of sample collection, including 233 never smokers and 37 current smokers<sup>45</sup>. We found no difference  
231 in the frequency of skewed XCI patterns between never and current smokers (36% and 35%  
232 respectively) in LCLs. To take into account the effects of age on the degree of skewing in blood-  
233 derived tissues and to examine the relationship between smoking status and degree of skewing at  
234 different ages, we split the dataset into a younger (age < 55) and older group (age ≥ 55; Table S2).  
235 While the frequencies of skewed XCI were very similar between young smokers and young never  
236 smokers (27% and 28% respectively), we detected a higher prevalence of skewed XCI in older

237 smokers compared with older never smokers (47% and 40% respectively). Accordingly, we found an  
238 overall positive association between XCI skew and smoking status in older ( $P = 0.02$ ), but not in  
239 younger individuals ( $P = 0.5$ ). The data suggest a role for smoking as a modulator of XCI skew in  
240 blood-derived tissues of females older than 55. Presumably, the association between smoking and  
241 XCI skew changes is complex, and further investigations are needed to characterize the genetic and  
242 molecular mechanisms underlying this phenomenon.

243

## 244 **Discussion**

245 In this study, we used multi-tissue transcriptomic data from twins to comprehensively characterize  
246 XCI patterns in LCLs, whole-blood, fat and skin tissues from a healthy twin cohort. We show XCI  
247 patterns to be tissue-specific and that blood-derived tissues exhibited the highest prevalence of  
248 skewed XCI and share the highest similarity of XCI patterns. These findings indicate that XCI patterns  
249 are partially driven by tissue-specific mechanisms, and that the XCI skew measured in blood is not a  
250 reliable proxy for the skew in other tissues. Skewed XCI patterns limited to disease-relevant tissues  
251 and cells have been observed in multiple conditions<sup>9,10,13,14,46,47</sup> but except for several cases of X-  
252 linked diseases, their roles in disease aetiology and predisposition remain largely unknown. Our  
253 results demonstrate that tissue-specific XCI patterns within an individual is common in this healthy  
254 population.

255

256 We show that XCI skewing levels in blood tissues increase with age, with an inflection point at  
257 around 55, confirming previous reports<sup>17-21,23,35,39,40</sup>. In this study, more than 41% of females >65  
258 years-old demonstrate skewed XCI patterns in blood-derived tissues, indicating that acquired  
259 skewed XCI is a highly prevalent phenotype in ageing populations. We show age-related increase in  
260 XCI skew is a distinctive feature of blood-derived tissues, with no evidence for an age-related  
261 increase in fat or skin. Age-related increase in XCI skew partially explains the higher incidence of

262 skewed XCI in blood than fat and skin tissues. The effects of age-related skewing of XCI on healthy  
263 ageing remain largely unknown, but may have a broad impact on the immune system.  
264 Hematopoietic stem cells and the immune system continue to develop throughout life. Presumably,  
265 imbalanced X-linked immune-related gene expression toward one parental haplotype leads to a  
266 reduced molecular diversity, which may translate in a decline of immune repertoire as well as poor  
267 sustenance of the immunological memory.

268

269 Previous twin studies have reported that XCI patterns in blood have a genetic component<sup>21,23</sup>. To  
270 our knowledge, this is the first study to investigate heritability of XCI skewing levels in other tissues.  
271 We found that the heritability of XCI skewing level is limited to blood-derived tissues of females >55  
272 years-old ( $h^2 = 0.34$ ), with no evidence of heritability in fat or skin or younger individuals in any  
273 tissue. The restriction of heritability to blood of older individuals is of interest given the link between  
274 skewed X-inactivation and clonal haematopoiesis. Positive selection of cells carrying an  
275 advantageous somatic mutation will lead to clonal haematopoiesis and skewed XCI patterns as the  
276 selected cells will carry the same inactivated parental X. Somatic mutation-driven clonal  
277 haematopoiesis is now known to be common in blood of healthy older individuals and is often  
278 referred to as clonal haematopoiesis of indeterminate potential (CHIP)<sup>31,48-50</sup>. CHIP is associated  
279 with increased risk of both cancer and all-cause mortality<sup>51,52</sup>. The increase in XCI skew in older  
280 smokers in our study is consistent with the increase in clonal haematopoiesis observed in  
281 smokers<sup>50,53,54</sup>. It is unknown to what extent CHIP accounts for age-acquired XCI skew, however if it  
282 is a major driver this would suggest that like age-related XCI skew, CHIP has a significant germline  
283 genetic component. Stochastic selection of cells could also contribute to the variance of XCI skewing  
284 levels, but, in agreement with previous works<sup>21,23</sup>, we reason that their contribution is minimal. If  
285 stochastic selection of cells was a dominant mechanism, the correlation of XCI patterns between  
286 twin pairs would decrease with age.

287

288 Overall, the data presented in this study indicate a Gene x Age interaction that shifts the functional  
289 allelic dosages of chromosome X in a tissue-restricted manner. The high prevalence of skewed XCI  
290 and tissue-restricted XCI in a healthy population could complicate discovery of Chromosome X  
291 variants associated with a trait and subsequent genetic risk prediction, as an individual's genotype  
292 may not match their functional genotypic dosage in the relevant tissue. Further investigations of  
293 the heterogeneity of XCI patterns across tissues and how this is regulated are essential to clarify the  
294 biomedical implications of skewed XCI and its role in healthy ageing in women.

295

## 296 **Materials and methods**

### 297 **Sample collection**

298 The study included 856 female twins from the TwinsUK registry<sup>28,29</sup> who participated in the MuTHER  
299 study<sup>55</sup>. Study participants included both monozygotic (MZ) and dizygotic (DZ) twins, aged 38-85  
300 years old (median age = 60; Suppl. Fig 1) and were of European ancestry. Volunteers received  
301 detailed information regarding all aspects of the research project and gave a prior signed consent  
302 to participate in the study. Peripheral blood samples were collected and lymphoblastoid cell lines  
303 (LCLs) were generated via Epstein-Barr virus (EBV) mediated transformation of the B-lymphocyte  
304 fraction. Punch biopsies of subcutaneous adipose tissue were taken from a photo-protected area  
305 adjacent and inferior to the umbilicus. Skin samples were obtained by dissection from the punch  
306 biopsies. Adipose and skin samples were weighed and frozen in liquid nitrogen. This project was  
307 approved by the research ethics committee at St Thomas' Hospital London, where all the TwinsUK  
308 biopsies were carried out. Volunteers gave informed consent and signed an approved consent form  
309 prior to the biopsy procedure. Volunteers were supplied with an appropriate detailed information  
310 sheet regarding the research project and biopsy procedure by post prior to attending for the biopsy.

## 311 **Genotyping and phasing**

312 Whole-Genome Sequence data (WGS) were generated within the UK10K project as previously  
313 described<sup>56</sup>. 557 individuals had both X-chromosome sequence data and RNA-seq data for at least  
314 one tissue. For individuals with unavailable X chromosome sequence data, X-linked genotypes data  
315 were retrieved from the TwinsUK genotypes previously imputed into the 1000 Genomes Project  
316 phase 1 reference panel<sup>57,58</sup>, as described<sup>59</sup>. Haplotypes of X-linked SNPs with a MAF >5% were then  
317 phased using shapeit v2.r837<sup>60,61</sup>, with the --chrX flag to set up all functionalities for the phasing of  
318 non pseudo-autosomal (non-PAR) regions of the X-chromosome, along with a phasing window of  
319 2Mb and 1000 conditional states. Phasing was performed using the genetic map b37 and the 1000  
320 Genomes Project phase 3 reference panel of non-PAR X-linked haplotypes<sup>61</sup>. Phased X-linked SNPs  
321 were used for further analysis.

## 322 **RNA-sequencing data**

323 RNA-sequencing data were generated as previously described<sup>29</sup>. Briefly, the Illumina TruSeq sample  
324 preparation protocol was used to generate the cDNA libraries for sequencing. Samples were then  
325 sequenced on an Illumina HiSeq 2000 machine and 49 bp paired-end reads were generated.  
326 Sequencing reads were aligned to the UCSC GRCh37/hg19 reference genome with the Burrows-  
327 Wheeler Aligner v.0.5.9<sup>62</sup>. Genes were annotated using the GENCODE v10 reference panel<sup>63</sup>.

## 328 **Longitudinal RNA-sequencing data**

329 Peripheral blood samples were collected 1 to 2.7 years apart from 114 female twins of the TwinsUK  
330 registry and were processed with the Illumina TruSeq protocol, sequenced on a HiSeq 2000 machine  
331 and 49 bp paired-end reads aligned as described in<sup>36</sup>. Adapter and polyA/T nucleotide sequences  
332 were trimmed using trim\_galore and PrinSeq tools<sup>64</sup>, respectively. Reads were aligned to the UCSC  
333 GRCh37/hg19 reference genome with the STAR v.2.5.2a aligner<sup>65</sup>. Alignments containing non-  
334 canonical and unannotated splice junctions were discarded. Properly paired and uniquely mapped  
335 reads with a MAPQ of 255 were retained for further analysis.

### 336 **Purified immune cells RNA-sequencing data**

337 Monocytes, B, T-CD4<sup>+</sup>, T-CD8<sup>+</sup> and NK cells were purified using fluorescence activated cell sorting  
338 (FACS) from two monozygotic twins exhibiting skewed XCI patterns in LCLs and from 1 individual  
339 exhibiting random XCI patterns. Total RNA was isolated and cDNA libraries for sequencing were  
340 generated using the Sureselect sample preparation protocol. Samples were then sequenced in  
341 triplicates on an Illumina HiSeq machine and 126 bp paired-end reads were generated. Adapter and  
342 polyA/T nucleotide sequences were trimmed using trim\_galore and PrinSeq tools<sup>64</sup> respectively.  
343 Human and prokaryotic rRNAs were identified using sortmerna v.2.1<sup>66</sup> and removed. Reads were  
344 aligned to the UCSC GRCh37/hg19 reference genome using STAR v.2.5.2a<sup>65</sup>. Alignments containing  
345 non-canonical and unannotated splice junctions were discarded. Properly paired and uniquely  
346 mapped reads with a MAPQ of 255 were retained for further analysis.

### 347 **Correction of RNA-seq mapping biases**

348 To eliminate mapping biases, all RNA-seq data were re-aligned within the WASP pipeline for  
349 mappability filtering<sup>67</sup>. The WASP tool has an algorithm specifically designed to identify and correct  
350 mapping biases in RNA-seq data. In each read overlapping a heterozygous SNP, the allele is flipped  
351 to the SNP's other allele (generating all possible allelic combinations) and the read is remapped.  
352 Reads that did not remap to the same genomic location indicate mapping bias and were discarded.  
353 Reads overlapping insertions and deletions were also discarded. Properly paired and uniquely  
354 mapped reads were retained for analysis.

### 355 **Quantification of allelic read counts and Allele Specific Expression**

356 Allelic read counts at heterozygous SNPs within *XIST* were quantified from paired RNA-seq and X-  
357 linked genotypes data with GATK ASEReadCounter<sup>68</sup>. Reads flagged by ASEReadCounter as having  
358 low base quality were discarded. To increase the confidence that genotypes were truly  
359 heterozygous, only X-linked SNPs with both alleles detected in RNA-seq data and with a read depth  
360 of least 10 reads were retained for analysis. X-chromosome allelic read count tables of samples with



361 at least 1 *XIST*-linked SNP passing all quality filters were retained as informative of XCI skewing  
362 levels. To quantify the allele specific expression (ASE) of each heterozygous X-linked SNP, the read  
363 count at the major allele was divided by the read depth at the site.

#### 364 **Quantification of $XIST_{ASE}$ and degree of skewing of XCI (DS)**

365 In each sample, the XCI skewing levels were quantified by averaging the ASE values of heterozygous  
366 SNPs within *XIST*. All SNPs were phased prior to averaging as detailed above. The measure, called  
367  $XIST_{ASE}$  is defined as follow:

$$368 \quad XIST_{ASE} = \frac{\sum XIST\_SNP_{ASE}}{n} \quad (XIST_{ASE})$$

369 where  $XIST\_SNP_{ASE}$  are the ASE values of heterozygous SNPs within *XIST* and  $n$  is the number of  
370 heterozygous SNPs within *XIST* in the sample.  $XIST_{ASE}$  is a proxy of XCI skewing levels in a sample,  
371 with values ranging from 0 to 1. An  $XIST_{ASE}$  value of 0.5 indicates equal inactivation of the two  
372 parental chromosomes, whereas a value of 0 or 1 indicates complete inactivation of one parental  
373 chromosome.

374 To be consistent with previous literature<sup>21,33</sup>, we classified samples with  $XIST_{ASE} \leq 0.2$  or  $XIST_{ASE} \geq$   
375 0.8 to have skewed XCI patterns, and samples with  $0.2 < XIST_{ASE} < 0.8$  to have random XCI patterns.  
376 To have an absolute measure of the magnitude of the XCI skewing levels in each sample, (or effect  
377 size of  $XIST_{ASE}$ ), the degree of skewing of XCI (DS) was calculated. DS is the absolute deviation of  
378  $XIST_{ASE}$  from 0.5. In each sample, DS was calculated as follow:

$$379 \quad DS = |0.5 - XIST_{ASE}| \quad (\text{Degree of skewing of XCI})$$

380 DS does not take into account the direction of XCI skewing, but the degree of deviation from a 50%  
381 XCI patterns ( $XIST_{ASE} = 0.5$ ). DS is then a measure of the magnitude of XCI skewing levels in a sample.  
382 DS values range from 0 to 0.5, where 0 means random XCI and 0.5 completely skewed XCI patterns.  
383 Samples with  $DS \geq 0.3$  were classified to have skewed XCI, while samples with  $DS < 0.3$  were  
384 classified to have random XCI.

## 385 Heritability analysis of DS

386 The relative contributions of additive genetic factors (A), shared (C) and unique environmental  
387 factors (E) to the tissue-specific variance of DS, were calculated using the *twinlm()* function in the  
388 *mets* R package<sup>69</sup>. For each tissue, samples were split into a young (< 55) and an older ( $\geq$  55) group  
389 according to their ages (Table S1). Due to the low number of MZ and DZ twin pairs in each group,  
390 whole-blood was excluded from heritability analysis. To further assess the contribution of genetic  
391 effects, the intraclass spearman's correlation (IC) of DS in blood-derived tissues of young and older  
392 MZ and DZ twin pairs was also calculated.

## 393 Association between degree of skewing and smoking status

394 Association between the degree of skewing in LCLs and self-reported smoking status was tested in  
395 the 270 individuals with reliable smoking status recorded<sup>45</sup>. Dataset included 270 females classified  
396 either as current smokers (N = 37) or never smokers (N = 233; Table S2). To examine the association  
397 between DS and smoking status, the smoking status was converted into a binary trait (0 = no smoker,  
398 1 = smoker). A linear model of the DS as a function of the smoking status was then implemented for  
399 younger (age < 55) and older (age  $\geq$  55) individuals separately. Age was used as covariate. A *P* value  
400  $\leq$  0.05 was considered to be statistically significant.

401

## 402 References

403

- 404 1 Lyon, M. F. Gene action in the X-chromosome of the mouse (*Mus musculus* L.). *Nature* **190**,  
405 372–373 (1961).
- 406 2 van den Berg, I. M. *et al.* X chromosome inactivation is initiated in human preimplantation  
407 embryos. *Am J Hum Genet* **84**, 771–779, doi:10.1016/j.ajhg.2009.05.003 (2009).
- 408 3 Brown, C. J. *et al.* A gene from the region of the human X inactivation centre is expressed  
409 exclusively from the inactive X chromosome. *Nature* **349**, 38–44, doi:10.1038/349038a0  
410 (1991).
- 411 4 Simon, M. D. *et al.* High-resolution Xist binding maps reveal two-step spreading during X-  
412 chromosome inactivation. *Nature* **504**, 465–469, doi:10.1038/nature12719 (2013).

- 413 5 Engreitz, J. M. *et al.* The Xist lncRNA exploits three-dimensional genome architecture to  
414 spread across the X chromosome. *Science* **341**, 1237973, doi:10.1126/science.1237973  
415 (2013).
- 416 6 Pinter, S. F. *et al.* Spreading of X chromosome inactivation via a hierarchy of defined  
417 Polycomb stations. *Genome Res* **22**, 1864–1876, doi:10.1101/gr.133751.111 (2012).
- 418 7 Wutz, A. Gene silencing in X-chromosome inactivation: advances in understanding  
419 facultative heterochromatin formation. *Nat Rev Genet* **12**, 542–553, doi:10.1038/nrg3035  
420 (2011).
- 421 8 Gendrel, A. V. & Heard, E. Fifty years of X-inactivation research. *Development* **138**, 5049–  
422 5055, doi:10.1242/dev.068320 (2011).
- 423 9 Puck, J. M., Nussbaum, R. L. & Conley, M. E. Carrier detection in X-linked severe combined  
424 immunodeficiency based on patterns of X chromosome inactivation. *J Clin Invest* **79**, 1395–  
425 1400, doi:10.1172/JCI112967 (1987).
- 426 10 Migeon, B. R. *et al.* Adrenoleukodystrophy: evidence for X linkage, inactivation, and  
427 selection favoring the mutant allele in heterozygous cells. *Proc Natl Acad Sci U S A* **78**, 5066–  
428 5070 (1981).
- 429 11 Ozbalkan, Z. *et al.* Skewed X chromosome inactivation in blood cells of women with  
430 scleroderma. *Arthritis Rheum* **52**, 1564–1570, doi:10.1002/art.21026 (2005).
- 431 12 Chabchoub, G. *et al.* Analysis of skewed X-chromosome inactivation in females with  
432 rheumatoid arthritis and autoimmune thyroid diseases. *Arthritis Res Ther* **11**, R106,  
433 doi:10.1186/ar2759 (2009).
- 434 13 Kristiansen, M. *et al.* High frequency of skewed X inactivation in young breast cancer  
435 patients. *J Med Genet* **39**, 30–33 (2002).
- 436 14 Buller, R. E., Sood, A. K., Lallas, T., Buekers, T. & Skilling, J. S. Association between  
437 nonrandom X-chromosome inactivation and BRCA1 mutation in germline DNA of patients  
438 with ovarian cancer. *J Natl Cancer Inst* **91**, 339–346 (1999).
- 439 15 Chitnis, S. *et al.* The role of X-chromosome inactivation in female predisposition to  
440 autoimmunity. *Arthritis Res* **2**, 399–406, doi:10.1186/ar118 (2000).
- 441 16 Libert, C., Dejager, L. & Pinheiro, I. The X chromosome in immune functions: when a  
442 chromosome makes the difference. *Nat Rev Immunol* **10**, 594–604, doi:10.1038/nri2815  
443 (2010).
- 444 17 Busque, L. *et al.* Nonrandom X-inactivation patterns in normal females: lyonization ratios  
445 vary with age. *Blood* **88**, 59–65 (1996).
- 446 18 Hatakeyama, C. *et al.* The dynamics of X-inactivation skewing as women age. *Clin Genet* **66**,  
447 327–332, doi:10.1111/j.1399-0004.2004.00310.x (2004).
- 448 19 Knudsen, G. P., Pedersen, J., Klingenberg, O., Lygren, I. & Orstavik, K. H. Increased skewing  
449 of X chromosome inactivation with age in both blood and buccal cells. *Cytogenet Genome*  
450 *Res* **116**, 24–28, doi:10.1159/000097414 (2007).
- 451 20 Wong, C. C. *et al.* A longitudinal twin study of skewed X chromosome-inactivation. *PLoS One*  
452 **6**, e17873, doi:10.1371/journal.pone.0017873 (2011).

- 453 21 Kristiansen, M. *et al.* Twin study of genetic and aging effects on X chromosome inactivation.  
454 *Eur J Hum Genet* **13**, 599–606, doi:10.1038/sj.ejhg.5201398 (2005).
- 455 22 Christensen, K. *et al.* X-linked genetic factors regulate hematopoietic stem-cell kinetics in  
456 females. *Blood* **95**, 2449–2451 (2000).
- 457 23 Vickers, M. A., McLeod, E., Spector, T. D. & Wilson, I. J. Assessment of mechanism of  
458 acquired skewed X inactivation by analysis of twins. *Blood* **97**, 1274–1281 (2001).
- 459 24 Bolduc, V. *et al.* No evidence that skewing of X chromosome inactivation patterns is  
460 transmitted to offspring in humans. *J Clin Invest* **118**, 333–341, doi:10.1172/JCI33166  
461 (2008).
- 462 25 Gale, R. E., Wheadon, H., Boulos, P. & Linch, D. C. Tissue specificity of X-chromosome  
463 inactivation patterns. *Blood* **83**, 2899–2905 (1994).
- 464 26 Bittel, D. C. *et al.* Comparison of X-chromosome inactivation patterns in multiple tissues  
465 from human females. *J Med Genet* **45**, 309–313, doi:10.1136/jmg.2007.055244 (2008).
- 466 27 Tukiainen, T. *et al.* Landscape of X chromosome inactivation across human tissues. *Nature*  
467 **550**, 244–248, doi:10.1038/nature24265 (2017).
- 468 28 Moayyeri, A., Hammond, C. J., Hart, D. J. & Spector, T. D. The UK Adult Twin Registry  
469 (TwinsUK Resource). *Twin Res Hum Genet* **16**, 144–149, doi:10.1017/thg.2012.89 (2013).
- 470 29 Buil, A. *et al.* Gene–gene and gene–environment interactions detected by transcriptome  
471 sequence analysis in twins. *Nat Genet* **47**, 88–91, doi:10.1038/ng.3162 (2015).
- 472 30 Gentilini, D. *et al.* Age-dependent skewing of X chromosome inactivation appears delayed in  
473 centenarians offspring. Is there a role for allelic imbalance in healthy aging and longevity?  
474 *Aging Cell* **11**, 277–283, doi:10.1111/j.1474-9726.2012.00790.x (2012).
- 475 31 Busque, L. *et al.* Recurrent somatic TET2 mutations in normal elderly individuals with clonal  
476 hematopoiesis. *Nat Genet* **44**, 1179–1181, doi:10.1038/ng.2413 (2012).
- 477 32 Cotton, A. M. *et al.* Analysis of expressed SNPs identifies variable extents of expression from  
478 the human inactive X chromosome. *Genome Biol* **14**, R122, doi:10.1186/gb-2013-14-11-  
479 r122 (2013).
- 480 33 Naumova, A. K. *et al.* Heritability of X chromosome—inactivation phenotype in a large  
481 family. *Am J Hum Genet* **58**, 1111–1119 (1996).
- 482 34 Allen, R. C., Zoghbi, H. Y., Moseley, A. B., Rosenblatt, H. M. & Belmont, J. W. Methylation of  
483 HpaII and HhaI sites near the polymorphic CAG repeat in the human androgen–receptor gene  
484 correlates with X chromosome inactivation. *Am J Hum Genet* **51**, 1229–1239 (1992).
- 485 35 Mossner, M. *et al.* Skewed X–inactivation patterns in ageing healthy and myelodysplastic  
486 haematopoiesis determined by a pyrosequencing based transcriptional clonality assay. *J Med*  
487 *Genet* **50**, 108–117, doi:10.1136/jmedgenet-2012-101093 (2013).
- 488 36 Bryois, J. *et al.* Time–dependent genetic effects on gene expression implicate aging  
489 processes. *Genome Res* **27**, 545–552, doi:10.1101/gr.207688.116 (2017).
- 490 37 de Hoon, B., Monkhorst, K., Riegman, P., Laven, J. S. & Gribnau, J. Buccal swab as a reliable  
491 predictor for X inactivation ratio in inaccessible tissues. *J Med Genet* **52**, 784–790,  
492 doi:10.1136/jmedgenet-2015-103194 (2015).

- 493 38 Pastinen, T. *et al.* A survey of genetic and epigenetic variation affecting human gene  
494 expression. *Physiol Genomics* **16**, 184–193, doi:10.1152/physiolgenomics.00163.2003  
495 (2004).
- 496 39 Gale, R. E., Fielding, A. K., Harrison, C. N. & Linch, D. C. Acquired skewing of X–chromosome  
497 inactivation patterns in myeloid cells of the elderly suggests stochastic clonal loss with age.  
498 *Br J Haematol* **98**, 512–519 (1997).
- 499 40 Tonon, L. *et al.* Unbalanced X–chromosome inactivation in haemopoietic cells from normal  
500 women. *Br J Haematol* **102**, 996–1003 (1998).
- 501 41 Gao, X., Jia, M., Zhang, Y., Breitling, L. P. & Brenner, H. DNA methylation changes of whole  
502 blood cells in response to active smoking exposure in adults: a systematic review of DNA  
503 methylation studies. *Clin Epigenetics* **7**, 113, doi:10.1186/s13148-015-0148-3 (2015).
- 504 42 Ma, Y. & Li, M. D. Establishment of a Strong Link Between Smoking and Cancer Pathogenesis  
505 through DNA Methylation Analysis. *Sci Rep* **7**, 1811, doi:10.1038/s41598-017-01856-4  
506 (2017).
- 507 43 Mahdi, H. *et al.* Specific interaction between genotype, smoking and autoimmunity to  
508 citrullinated alpha–enolase in the etiology of rheumatoid arthritis. *Nat Genet* **41**, 1319–1324,  
509 doi:10.1038/ng.480 (2009).
- 510 44 Klebaner, D. *et al.* X chromosome–wide analysis identifies DNA methylation sites influenced  
511 by cigarette smoking. *Clin Epigenetics* **8**, 20, doi:10.1186/s13148-016-0189-2 (2016).
- 512 45 Tsai, P. C. *et al.* Smoking induces coordinated DNA methylation and gene expression changes  
513 in adipose tissue with consequences for metabolic health. *Clin Epigenetics* **10**, 126,  
514 doi:10.1186/s13148-018-0558-0 (2018).
- 515 46 Andreu, N. *et al.* Wiskott–Aldrich syndrome in a female with skewed X–chromosome  
516 inactivation. *Blood Cells Mol Dis* **31**, 332–337 (2003).
- 517 47 Li, G. *et al.* Skewed X chromosome inactivation of blood cells is associated with early  
518 development of lung cancer in females. *Oncol Rep* **16**, 859–864 (2006).
- 519 48 Abelson, S. *et al.* Prediction of acute myeloid leukaemia risk in healthy individuals. *Nature*  
520 **559**, 400–404, doi:10.1038/s41586-018-0317-6 (2018).
- 521 49 Loh, P. R. *et al.* Insights into clonal haematopoiesis from 8,342 mosaic chromosomal  
522 alterations. *Nature* **559**, 350–355, doi:10.1038/s41586-018-0321-x (2018).
- 523 50 Zink, F. *et al.* Clonal hematopoiesis, with and without candidate driver mutations, is common  
524 in the elderly. *Blood* **130**, 742–752, doi:10.1182/blood-2017-02-769869 (2017).
- 525 51 Steensma, D. P. *et al.* Clonal hematopoiesis of indeterminate potential and its distinction  
526 from myelodysplastic syndromes. *Blood* **126**, 9–16, doi:10.1182/blood-2015-03-631747  
527 (2015).
- 528 52 Steensma, D. P. Clinical consequences of clonal hematopoiesis of indeterminate potential.  
529 *Blood Adv* **2**, 3404–3410, doi:10.1182/bloodadvances.2018020222 (2018).
- 530 53 Genovese, G. *et al.* Clonal hematopoiesis and blood–cancer risk inferred from blood DNA  
531 sequence. *N Engl J Med* **371**, 2477–2487, doi:10.1056/NEJMoa1409405 (2014).

- 532 54 Coombs, C. C. *et al.* Therapy-Related Clonal Hematopoiesis in Patients with Non-  
533 hematologic Cancers Is Common and Associated with Adverse Clinical Outcomes. *Cell Stem*  
534 *Cell* **21**, 374–382 e374, doi:10.1016/j.stem.2017.07.010 (2017).
- 535 55 Grundberg, E. *et al.* Mapping cis- and trans-regulatory effects across multiple tissues in  
536 twins. *Nat Genet* **44**, 1084–1089, doi:10.1038/ng.2394 (2012).
- 537 56 Consortium, U. K. *et al.* The UK10K project identifies rare variants in health and disease.  
538 *Nature* **526**, 82–90, doi:10.1038/nature14962 (2015).
- 539 57 Zheng, H. F. *et al.* Performance of genotype imputation for low frequency and rare variants  
540 from the 1000 genomes. *PLoS One* **10**, e0116487, doi:10.1371/journal.pone.0116487  
541 (2015).
- 542 58 Genomes Project, C. *et al.* An integrated map of genetic variation from 1,092 human  
543 genomes. *Nature* **491**, 56–65, doi:10.1038/nature11632 (2012).
- 544 59 Suhre, K. *et al.* Human metabolic individuality in biomedical and pharmaceutical research.  
545 *Nature* **477**, 54–60, doi:10.1038/nature10354 (2011).
- 546 60 Delaneau, O., Zagury, J. F. & Marchini, J. Improved whole-chromosome phasing for disease  
547 and population genetic studies. *Nat Methods* **10**, 5–6, doi:10.1038/nmeth.2307 (2013).
- 548 61 Delaneau, O., Marchini, J., Genomes Project, C. & Genomes Project, C. Integrating sequence  
549 and array data to create an improved 1000 Genomes Project haplotype reference panel. *Nat*  
550 *Commun* **5**, 3934, doi:10.1038/ncomms4934 (2014).
- 551 62 Li, H. & Durbin, R. Fast and accurate short read alignment with Burrows-Wheeler transform.  
552 *Bioinformatics* **25**, 1754–1760, doi:10.1093/bioinformatics/btp324 (2009).
- 553 63 Harrow, J. *et al.* GENCODE: the reference human genome annotation for The ENCODE  
554 Project. *Genome Res* **22**, 1760–1774, doi:10.1101/gr.135350.111 (2012).
- 555 64 Schmiieder, R. & Edwards, R. Quality control and preprocessing of metagenomic datasets.  
556 *Bioinformatics* **27**, 863–864, doi:10.1093/bioinformatics/btr026 (2011).
- 557 65 Dobin, A. *et al.* STAR: ultrafast universal RNA-seq aligner. *Bioinformatics* **29**, 15–21,  
558 doi:10.1093/bioinformatics/bts635 (2013).
- 559 66 Kopylova, E., Noe, L. & Touzet, H. SortMeRNA: fast and accurate filtering of ribosomal RNAs  
560 in metatranscriptomic data. *Bioinformatics* **28**, 3211–3217,  
561 doi:10.1093/bioinformatics/bts611 (2012).
- 562 67 van de Geijn, B., McVicker, G., Gilad, Y. & Pritchard, J. K. WASP: allele-specific software for  
563 robust molecular quantitative trait locus discovery. *Nat Methods* **12**, 1061–1063,  
564 doi:10.1038/nmeth.3582 (2015).
- 565 68 Castel, S. E., Levy-Moonshine, A., Mohammadi, P., Banks, E. & Lappalainen, T. Tools and best  
566 practices for data processing in allelic expression analysis. *Genome Biol* **16**, 195,  
567 doi:10.1186/s13059-015-0762-6 (2015).
- 568 69 Scheike, T. H., Holst, K. K. & Hjelmberg, J. B. Estimating heritability for cause specific  
569 mortality based on twin studies. *Lifetime Data Anal* **20**, 210–233, doi:10.1007/s10985-013-  
570 9244-x (2014).
- 571

572 **Acknowledgements**

573 This study was supported by MRC Project Grant (MR/R023131/1) to K.S.S. The TwinsUK study was  
574 funded by the Wellcome Trust and European Community's Seventh Framework Programme  
575 (FP7/2007-2013). The TwinsUK study also receives support from the National Institute for Health  
576 Research (NIHR)- funded BioResource, Clinical Research Facility and Biomedical Research Centre  
577 based at Guy's and St Thomas' NHS Foundation Trust in partnership with King's College London.  
578 This project was enabled through access to the MRC eMedLab Medical Bioinformatics  
579 infrastructure, supported by the Medical Research Council [grant number MR/L016311/1]

580  
581 **Authors contributions**

582 A.Z. M.D. and K.S.S conceived and designed the project. A.Z performed analysis. SN contributed  
583 data discussion. P.C.T and J.T.B. contributed data. SR and C.Y.W performed HUMARA experiments.  
584 A.Z. and K.S.S. wrote the manuscript. All authors read and approved the manuscript. The authors  
585 also thank Julia El-Sayed Moustafa and Amy Roberts for providing feedback on the manuscript.

586  
587 **Competing interests**

588 The authors declare that they have no competing interests.  
589

590 **Materials and Correspondence**

591 Correspondence should be addressed to Kerrin S. Small ([kerrin.small@kcl.ac.uk](mailto:kerrin.small@kcl.ac.uk))

592

593 **Data Availability**

594 TwinsUK RNAseq data is available from EGA (Accession number: EGAS00001000805).

595 TwinsUK genotypes are available upon application to TwinsUK ([www.twinsuk.ac.uk](http://www.twinsuk.ac.uk)).

596

597

598

599

600

601

602

603

604

605

606 FIGURES

607

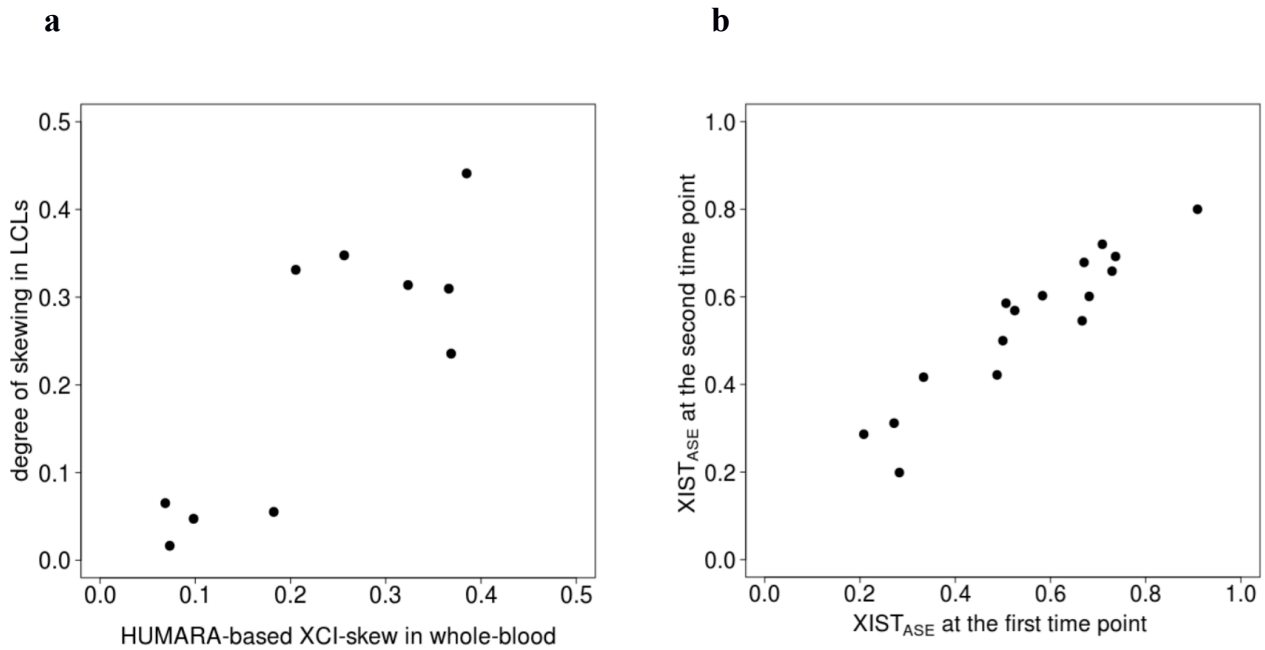

**Fig. 1 Comparison to HUMARA and longitudinal quantifications of XCI skewing levels reveal that  $XIST_{ASE}$  is a reproducible and accurate proxy of XCI skewing levels. a** Scatter plot showing the comparison between the XCI skewing levels in 10 whole-blood and LCLs samples quantified with HUMARA and  $XIST_{ASE}$  respectively. **b** Scatter plot of the  $XIST_{ASE}$  at time point 1 and at time point 2 in 16 whole-blood samples.



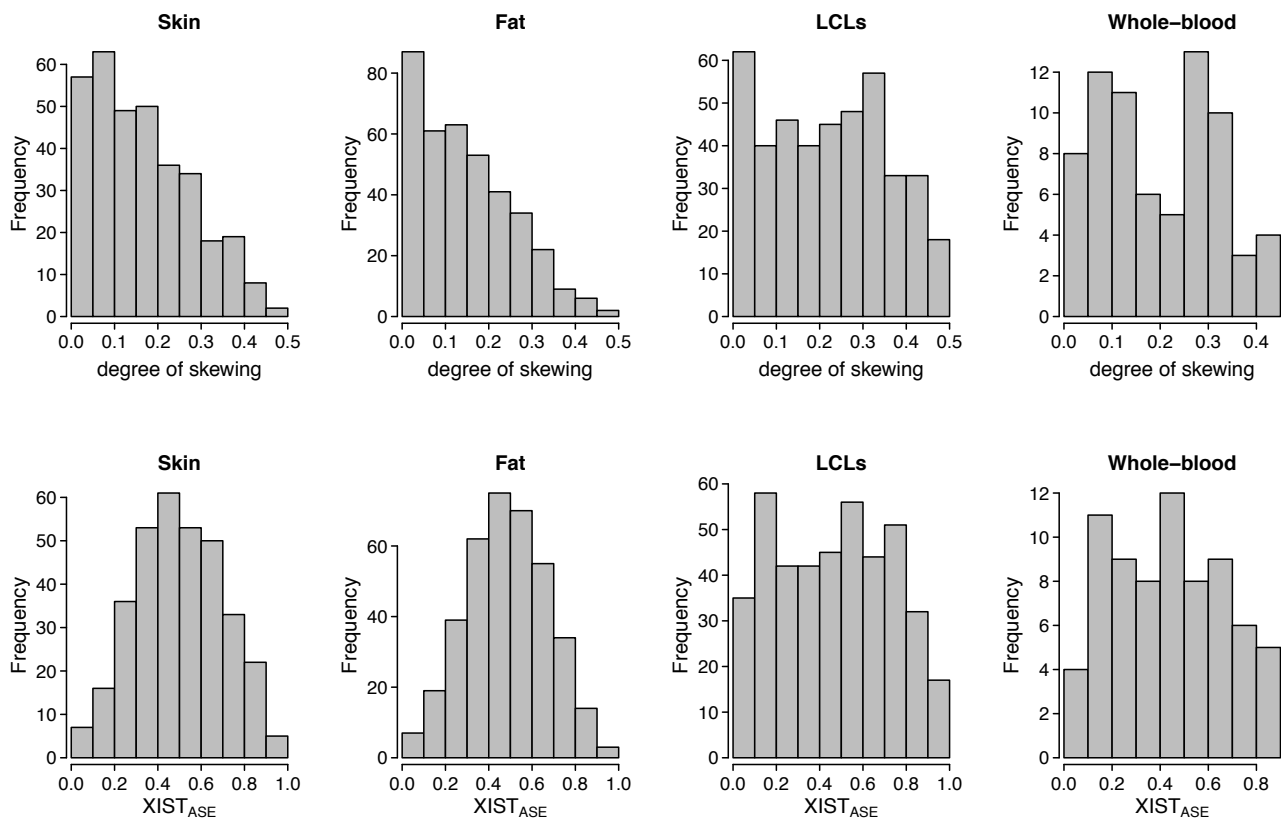

**Fig. 2 Skewed chromosome X inactivation varies across tissues with a higher prevalence of**

**skewed samples in blood-derived tissues than fat and skin tissues.** Distribution of the degree of skewing (top row) and  $XIST_{ASE}$  (bottom row) in LCLs (422 samples), whole-blood (72 samples), fat (378 samples) and skin (336 samples) tissues.

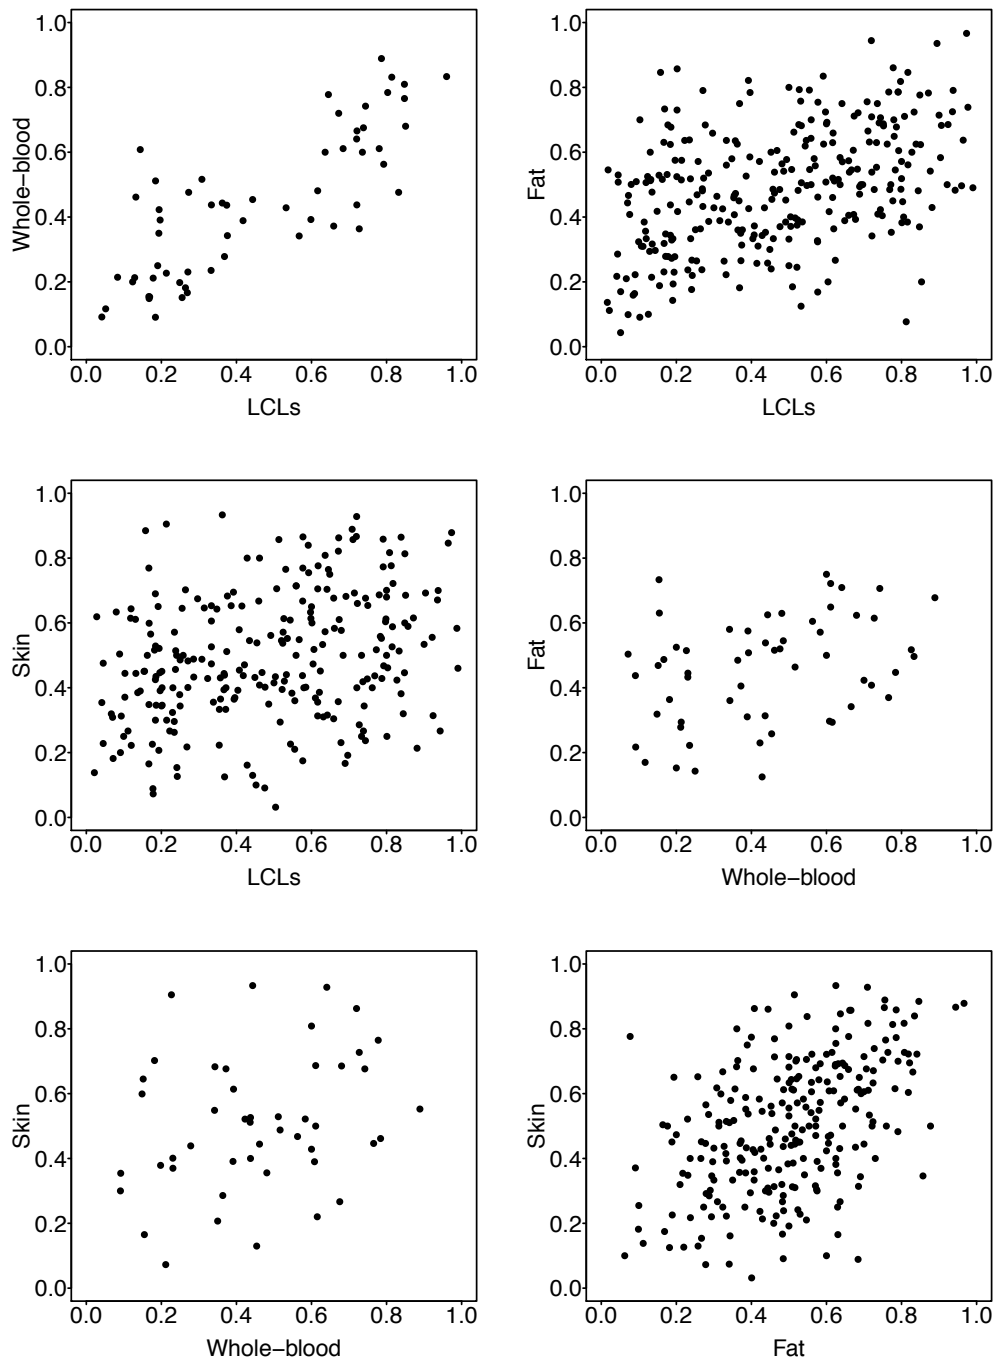

**Fig. 3** Pairwise tissue-tissue comparison of the  $XIST_{ASE}$  calls reveal highest similarity of XCI skewing levels between blood-derived tissues. Each plot shows the comparison of  $XIST_{ASE}$  between two tissues from an individual. Each dot represents an individual. In each comparison all individuals with available  $XIST_{ASE}$  calls for both tissues were included.

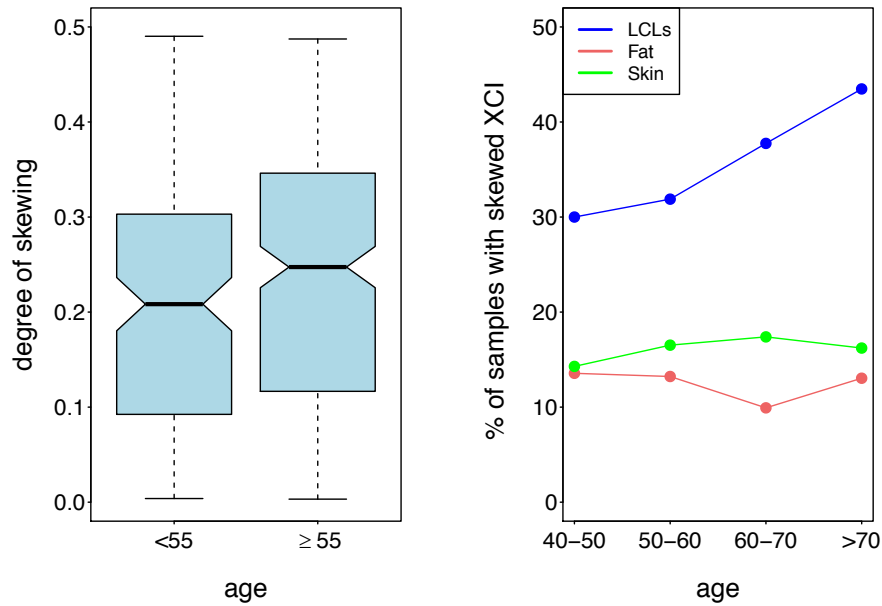

**Fig. 4 Skewed X-chromosome inactivation (XCI) increases with age in blood-derived tissues but not in fat or skin tissues.** Left panel, *boxplots* show the degree of skewing in LCLs samples <55 and  $\geq 55$ . Right panel, *line plots* show the frequencies of skewed XCI at different ages in LCLs (blue), fat (red) and skin (green) tissues.

## TABLES

| Tissue      | Informative individuals | Skewed XCI individuals | Prevalence of skewed XCI |
|-------------|-------------------------|------------------------|--------------------------|
| LCLs        | 422                     | 145                    | 34%                      |
| Whole-blood | 72                      | 20                     | 28%                      |
| Fat         | 378                     | 45                     | 12%                      |
| Skin        | 336                     | 54                     | 16%                      |

**Table 1. Prevalence of skewed X-inactivation (XCI) differs across tissues in the TwinsUK cohort.**

| <b>Tissue</b> | LCLs         | Whole-blood  | Fat          | Skin         |
|---------------|--------------|--------------|--------------|--------------|
| LCLs          | *            | 0.78 [2e-13] | 0.42 [5e-14] | 0.3 [1e-06]  |
| Whole-blood   | 0.78 [2e-13] | *            | 0.33 [1e-02] | 0.3 [4e-02]  |
| Fat           | 0.42 [5e-14] | 0.33 [1e-02] | *            | 0.47 [2e-15] |
| Skin          | 0.3 [1e-06]  | 0.3 [4e-02]  | 0.47 [2e-15] | *            |

**Table 2. Correlation of XCI-skew varies between tissue pairs, and is highest between blood-derived tissues.** Coefficient of correlation [and its p-value] of XCI-skew between tissue pairs.

| <b>Cell types</b>              | <b>Degree of skewing in Twin A</b> | <b>Degree of skewing in Twin B</b> | <b>Degree of skewing in Individual C</b> |
|--------------------------------|------------------------------------|------------------------------------|------------------------------------------|
| <b>LCLs</b>                    | 0.45                               | 0.45                               | 0.1                                      |
| <b>Monocytes</b>               | 0.43                               | 0.42                               | 0.05                                     |
| <b>B-cells</b>                 | 0.4                                | 0.42                               | NA                                       |
| <b>T-CD4<sup>+</sup> cells</b> | 0.28                               | NA                                 | 0.05                                     |
| <b>T-CD8<sup>+</sup> cells</b> | 0.44                               | 0.3                                | 0.06                                     |
| <b>NK-cells</b>                | 0.4                                | NA                                 | 0.01                                     |

**Table 3. XCI-skew in LCLs in this study is representative of XCI in purified primary immune cells.**

Degree of skewing of XCI in immune cell types purified from 2 monozygotic twins (Twin A, Twin B) exhibiting skewed XCI patterns in LCLs, and from 1 individual (Individual C) exhibiting random XCI pattern in LCLs. Degree of skewing  $\geq 0.3$  indicates skewed XCI patterns.

| <b>Tissue [age group]</b> | <b>Additive genetics (h<sup>2</sup>)</b> | <b>Common Environment</b> | <b>Unique Environment</b> |
|---------------------------|------------------------------------------|---------------------------|---------------------------|
| LCLs [<55]                | 0                                        | 0.01                      | 0.99                      |
| LCLs [≥55]                | 0.34                                     | 0                         | 0.66                      |
| Fat [<55]                 | 0                                        | 0.27                      | 0.73                      |
| Fat [≥55]                 | 0                                        | 0.08                      | 0.92                      |
| Skin [<55]                | 0                                        | 0                         | 1                         |
| Skin [≥55]                | 0                                        | 0                         | 1                         |

**Table 4. XCI-skew is heritable in blood-derived tissues of older females.** Estimates of the relative contribution of additive genetics, common environment and unique environmental factors to the tissue-specific XCI-skew in age-stratified twins.

|                                | <b>MZ<sub>allAges</sub></b> | <b>MZ<sub>young</sub></b> | <b>MZ<sub>older</sub></b> | <b>DZ<sub>allAges</sub></b> | <b>DZ<sub>young</sub></b> | <b>DZ<sub>older</sub></b> |
|--------------------------------|-----------------------------|---------------------------|---------------------------|-----------------------------|---------------------------|---------------------------|
| <b>n. pairs</b>                | 61                          | 18                        | 43                        | 63                          | 25                        | 38                        |
| <b>Intra-class correlation</b> | 0.31                        | 0.06                      | 0.42                      | 0                           | 0.1                       | -0.1                      |
| <b>P-value</b>                 | 0.02                        | 0.8                       | 0.005                     | 0.9                         | 0.6                       | 0.7                       |

**Table 5. Intra-class correlations of XCI skew in age stratified twin pairs.** Twin pairs < 55 years-old are classified as young, twin pairs ≥ 55 years-old are classified as old.
